# Supplementary material for: Predictors of Patient-Reported Pain and Functional Outcomes Over 10 Years After Primary Total Knee Arthroplasty: A Prospective Cohort Study
Source: PubMed Central journal article supplement — J Arthroplasty. 2017 Jan;32(1):92–100.e2. doi: 10.1016/j.arth.2016.06.009 (PMC5178876; doi:10.1016/j.arth.2016.06.009), 2017-01
Supplement: mmc4.pdf [file mmc4.pdf]

# CONFLICT OF INTEREST STATEMENT

## *The Journal of Arthroplasty*

(Adopted from the American Academy of Orthopaedic Surgeons disclosure statement)

The following form **must be filled out completely and submitted by each author (example, 6 authors, 6 forms). If no discloser is required, please write/type "none" at the end of each sentence.**

Manuscript Title: Predictors of patient-reported pain and functional outcomes over 10 years after primary total knee replacement: a prospective cohort study

1. Royalties from a company or supplier (The following conflicts were disclosed) Zimmer Biomet
2. Speakers bureau/paid presentations for a company or supplier (The following conflicts were disclosed) none
- 3A. Paid employee for a company or supplier (The following conflicts were disclosed) none
- 3B. Paid consultant for a company or supplier (The following conflicts were disclosed) Zimmer Biomet
- 3C. Unpaid consultants for a company or supplier (The following conflicts were disclosed) none
4. Stock or stock options in a company or supplier (The following conflicts were disclosed) none
5. Research support from a company or supplier as a Principal Investigator (The following conflicts were disclosed) Zimmer Biomet & Stryker
6. Other financial or material support from a company or supplier (The following conflicts were disclosed) none
7. Royalties, financial or material support from publishers (The following conflicts were disclosed) none
8. Medical/Orthopaedic publications editorial/governing board (The following conflicts were disclosed) none
9. Board member/committee appointments for a society (The following conflicts were disclosed) none

**Each author must sign AND print or type his/her name, date and submit a separate form**

In addition, one BLINDED Conflict of Interest form (no author names used) should be submitted per manuscript with all author disclosures.

---

|                             |                  |        |
|-----------------------------|------------------|--------|
| DAVID MURRAY                | David Murray     | 9/2/16 |
| Author Name (Print or Type) | Author Signature | Date   |
