# Supplementary material for: Predictors of Patient-Reported Pain and Functional Outcomes Over 10 Years After Primary Total Knee Arthroplasty: A Prospective Cohort Study
Source: PubMed Central journal article supplement — J Arthroplasty. 2017 Jan;32(1):92–100.e2. doi: 10.1016/j.arth.2016.06.009 (PMC5178876; doi:10.1016/j.arth.2016.06.009), 2017-01
Supplement: mmc5.pdf [file mmc5.pdf]

# CONFLICT OF INTEREST STATEMENT

## *The Journal of Arthroplasty*

(Adopted from the American Academy of Orthopaedic Surgeons disclosure statement)

The following form **must be filled out completely and submitted by each author (example, 6 authors, 6 forms)**. **If no disclosure is required, please write/type "none" at the end of each sentence.**

Manuscript Title: **Predictors of patient-reported pain and functional outcomes over 10 years after primary total knee replacement: a prospective cohort study**

1. Royalties from a company or supplier (The following conflicts were disclosed) NONE
2. Speakers bureau/paid presentations for a company or supplier (The following conflicts were disclosed)  
Merck, Merck Sharp and Dohme, Roche, Novartis, Smith and Nephew, Q-MED, Nicox, Servier, GlaxoSmithKline, Schering-Plough, Pfizer, and Rottapharm
- 3A. Paid employee for a company or supplier (The following conflicts were disclosed) NONE
- 3B. Paid consultant for a company or supplier (The following conflicts were disclosed) NONE  
Merck, Merck Sharp and Dohme, Roche, Novartis, Smith and Nephew, Q-MED, Nicox, Servier, GlaxoSmithKline, Schering-Plough, Pfizer, and Rottapharm
- 3C. Unpaid consultants for a company or supplier (The following conflicts were disclosed) NONE
4. Stock or stock options in a company or supplier (The following conflicts were disclosed) NONE
5. Research support from a company or supplier as a Principal Investigator (The following conflicts were disclosed)  
Merck, Merck Sharp and Dohme, Roche, Novartis, Smith and Nephew, Q-MED, Nicox, Servier, GlaxoSmithKline, Schering-Plough, Pfizer, and Rottapharm
6. Other financial or material support from a company or supplier (The following conflicts were disclosed) NONE
7. Royalties, financial or material support from publishers (The following conflicts were disclosed) NONE
8. Medical/Orthopaedic publications editorial/governing board (The following conflicts were disclosed) NONE
9. Board member/committee appointments for a society (The following conflicts were disclosed) NONE

**Each author must sign AND print or type his/her name, date and submit a separate form**

In addition, one BLINDED Conflict of Interest form (no author names used) should be submitted per manuscript with all author disclosures.

---

| Author Name (Print or Type) | Author Signature                                                                  | Date      |
|-----------------------------|-----------------------------------------------------------------------------------|-----------|
| Nigel Arden                 | 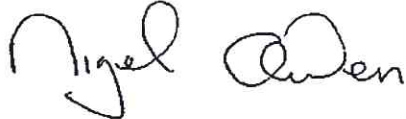 | 20/3/2016 |
